# Supplementary material for: Highly sensitive and selective non-enzymatic glucose detection based on indigo carmine/hemin/H2O2 chemiluminescence
Source: Royal Society of Chemistry journal article supplement (doi:10.1039/c9an02100k), 2019-12-06
Supplement: c9an02100k1.pdf [file c9an02100k1.pdf]

## Highly sensitive and selective non-enzymatic glucose detection based on indigo carmine/hemin/H<sub>2</sub>O<sub>2</sub> chemiluminescence

Tadesse Haile Fereja,<sup>a,b,c</sup> Shimeles Addisu Kitte,<sup>a,d</sup> Muhammad Nadeem Zafar,<sup>a,e</sup> Mohamed Ibrahim Halawa,<sup>a,b</sup> Shuang Han,<sup>a,f\*</sup> Wei Zhang<sup>a,\*</sup> and Guobao Xu<sup>a,g\*</sup>

<sup>a</sup> State Key Laboratory of Electroanalytical Chemistry, Changchun Institute of Applied Chemistry, Chinese Academy of Sciences, 5625 Renmin Street, Changchun, Jilin 130022, P.R. China

<sup>b</sup> University of Chinese Academy of Sciences, Beijing 100049, P.R. China

<sup>c</sup> Ambo University, College of Medicine and Health Sciences, Department of Pharmacy, P.O Box 19, Ambo, Ethiopia

<sup>d</sup> Jimma University, College of Natural Sciences, Department of Chemistry, P.O. Box 378 Jimma, Ethiopia

<sup>e</sup> Department of Chemistry, University of Gujrat, Gujrat, 50700 Pakistan

<sup>f</sup> College of Applied Chemistry, Shenyang University of Chemical Technology, Shenyang 110142, PR China.

<sup>g</sup> University of Science and Technology of China, Hefei, China

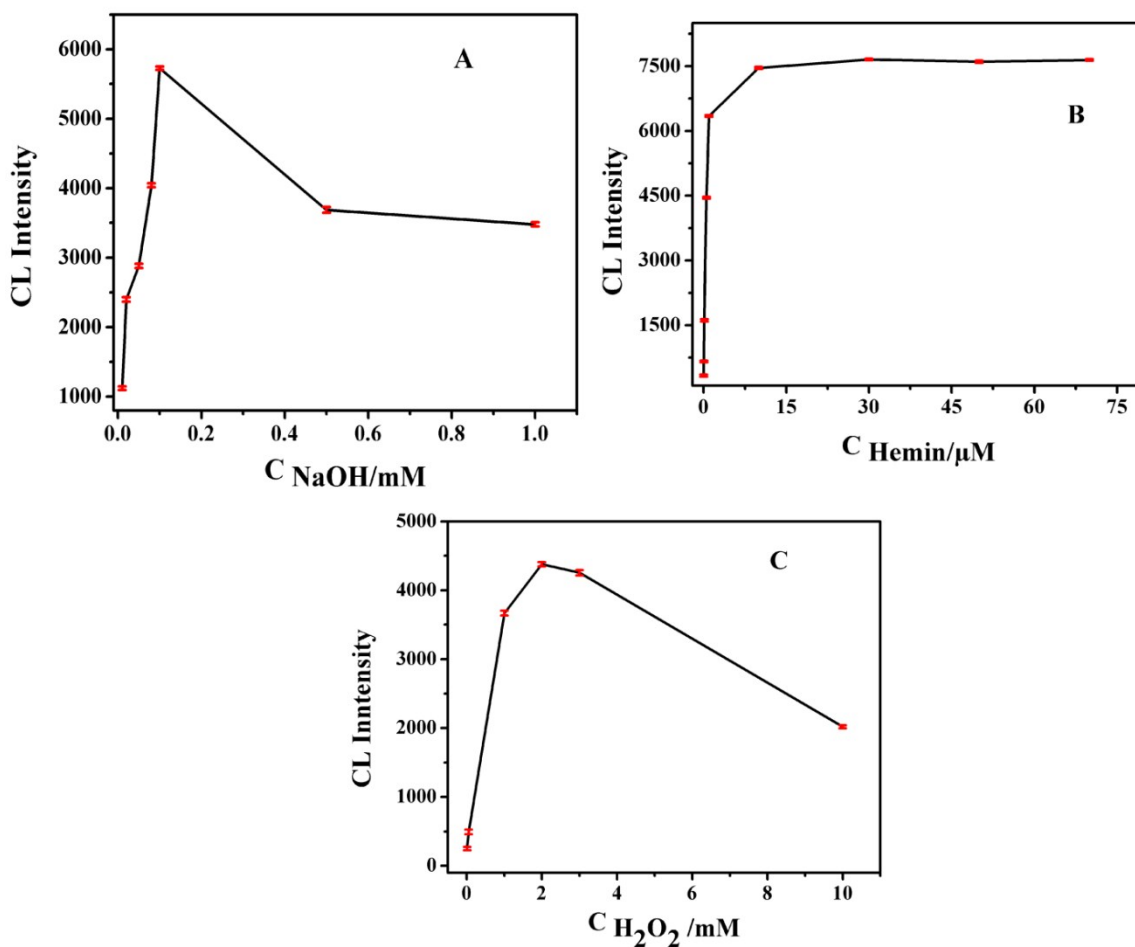

**Figure S1.** Relations of CL intensities and the concentrations of NaOH (A), Hemin (B) and H<sub>2</sub>O<sub>2</sub> (C).  $C_{\text{glucose}} = 500 \mu\text{M}$ ,  $C_{\text{IC}} = 1.0 \text{ mM}$ , in 0.1 M NaOH solution while, Hamamatsu CR-131 photomultiplier tube (PMT) was operated at  $-800 \text{ V}$

**Table S1. Performance comparison of present method with reported IC detection methods.**

| Analytical method                                  | Linear range                            | LOD                 | Ref       |
|----------------------------------------------------|-----------------------------------------|---------------------|-----------|
| Resonance Rayleigh scattering                      | 2.0 $\mu\text{M}$ – 32.0 $\mu\text{M}$  | 0.024 $\mu\text{M}$ | [1]       |
| Spectrophotometric                                 | 1.7 $\mu\text{M}$ – 39.0 $\mu\text{M}$  | 0.06 $\mu\text{M}$  | [2]       |
| Cyclic voltammetry                                 | 15.0 $\mu\text{M}$ – 60.0 $\mu\text{M}$ | 0.11 $\mu\text{M}$  | [3]       |
| Capillary electrophoresis                          | N/A                                     | 3.2 $\mu\text{M}$   | [4]       |
| Green Chromatographic                              | 2.1 $\mu\text{M}$ - 21 $\mu\text{M}$    | 0.17 $\mu\text{M}$  | [5]       |
| IC/Hemin/Glucose/H <sub>2</sub> O <sub>2</sub> -CL | 3.2 $\mu\text{M}$ –10.0 mM              | 1.45 $\mu\text{M}$  | This work |

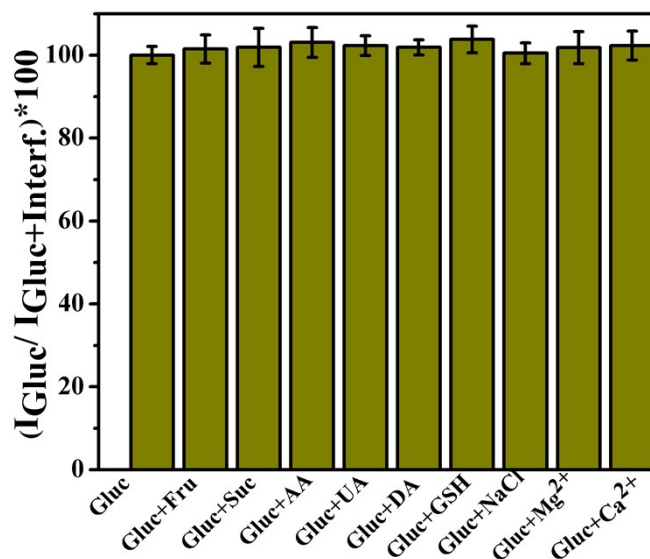

**Figure S2.** CL response of the system in the absence of additional interference as control (glucose only) and in the presence of different interfering species.

## References

- [1] Q. Li, J.D. Yang, X.P. Tan, Z. Zhang, X.M. Hu, Y. M.H. Yang, A simple and rapid resonance Rayleigh scattering method for detection of indigo carmine in soft drink, *Luminescence*, 2016, **31**, 1152-1157.
- [2] J.J. Berzas, J. Rodríguez Flores, M.J. Villaseñor Llerena, N. Rodríguez Fariñas, Spectrophotometric resolution of ternary mixtures of Tartrazine, Patent Blue V and Indigo Carmine in commercial products, *Anal. Chim. Acta*, 1999, **391**, 353-364.
- [3] J.G.G. Manjunatha, A novel poly (glycine) biosensor towards the detection of indigo carmine: A voltammetric study, *J. Food Drug Anal.*, 2018, **26**, 292-299.
- [4] M.A. Prado, L.F.V. Boas, M.R. Bronze, H.T. Godoy, Validation of methodology for simultaneous determination of synthetic dyes in alcoholic beverages by capillary electrophoresis, *J. Chromatogr. A*, 2006, **1136**, 231-236.
- [5] M. Khanavi, M. Hajimahmoodi, A.M. Ranjbar, M.R. Oveisi, M.R.S. Ardekani, G. Mogaddam, Development of a Green Chromatographic Method for Simultaneous Determination of Food Colorants, *Food Anal. Method.*, 2012, **5**, 408-415.
